# Supplementary material
Source: PubMed Central journal article supplement (PMC6952592)
Supplement: supp_RA119.008336_144172_3_supp_435573_q1mqhb.pdf [file supp_RA119.008336_144172_3_supp_435573_q1mqhb.pdf]

## Supporting Information for

PERK-mediated induction of microRNA-483 disrupts cellular ATP homeostasis during the unfolded protein response

Nobuhiko Hiramatsu<sup>1</sup>, Karen Chiang<sup>1,2</sup>, Cathrine Aivati<sup>1</sup>, Jeffrey J. Rodvold<sup>3</sup>, Ji-Min Lee<sup>4</sup>, Jaeseok Han<sup>4</sup>, Leon Chea<sup>5</sup>, Maurizio Zanetti<sup>3</sup>, Edward H. Koo<sup>2,6</sup>, Jonathan H. Lin<sup>1,5,7\*</sup>

<sup>1</sup>Department of Pathology, <sup>2</sup>Neurosciences, <sup>3</sup>Moore's Cancer Center, University of California San Diego, 9500 Gilman Drive, La Jolla, 92093-0612. <sup>4</sup>Soonchunhyang Institute of Med-bio Science, Soonchunhyang University, Republic of Korea 31151. <sup>5</sup>Department of Pathology, Stanford University, Stanford, CA 94304. <sup>6</sup>Departments of Medicine and Physiology, National University of Singapore, Yong Loo Lin School of Medicine, Singapore 117549. <sup>7</sup>VA Palo Alto Healthcare System, Palo Alto, CA 94304

\*Correspondence to: Jonathan Lin: [jlinn@stanford.edu](mailto:jlinn@stanford.edu)

**This PDF file includes:**

Figures S1 to S2

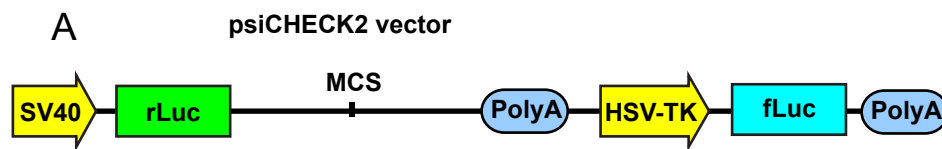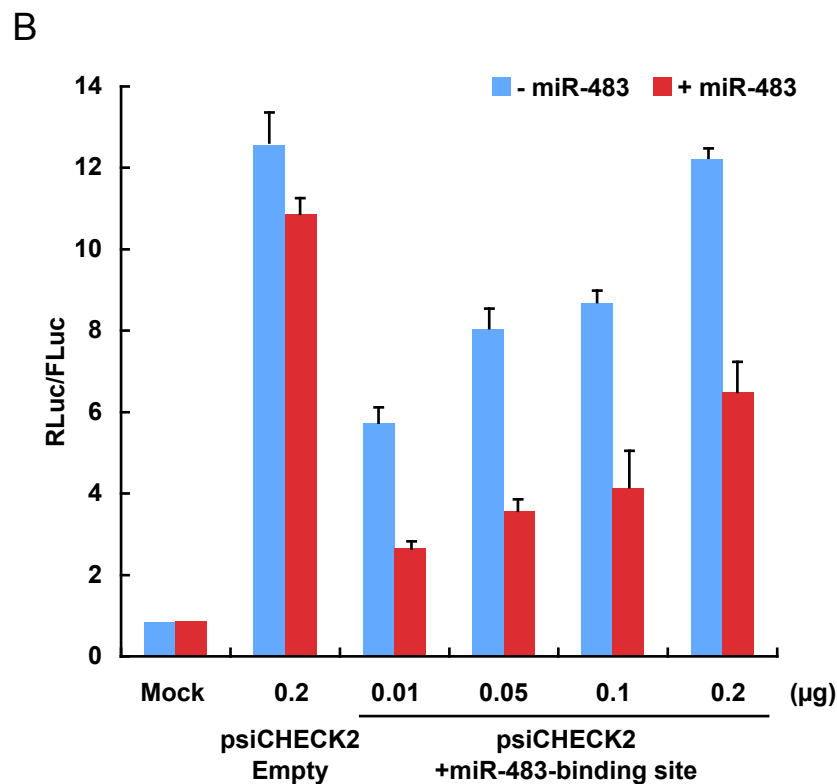

Figure S1. Functional validation of miR expression. A. miR binding sites were inserted into the multiple cloning site (MCS) of the psiCHECK2 vector. B. Lysates from cells transfected with psiCHECK2 containing a miR-483 binding site were collected. Luminescence was quantified in the presence or absence of miR-483 coexpression, and Renilla luciferase (RLuc) to Firefly luciferase (FLuc) ratio is shown. Values are expressed as mean +/- S.D. of at least 3 experiments.

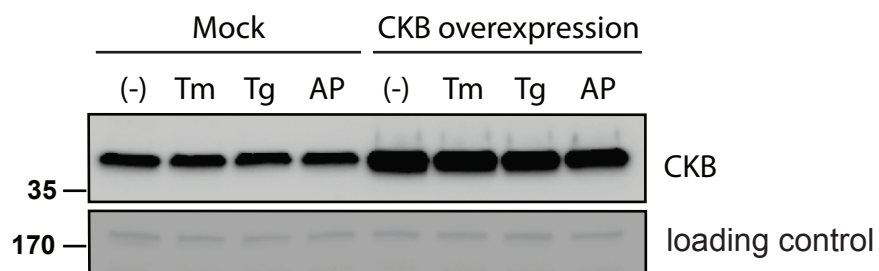

**Figure S2. Overexpression of CKB in HeLa cells.** HeLa cells were mock or CKB transfected, and then treated with tunicamycin (Tm, 5 mg/ml), thapsigargin (Tg, 500 nM), or AP20187 (AP, 1 nM). Lysates were collected after 48 hours, and CKB was detected by immunoblotting. A non-specific background band is shown as a loading control.
